# Supplementary material for: Regulation of myogenic progenitor proliferation in human fetal skeletal muscle by BMP4 and its antagonist Gremlin
Source: PubMed Central journal article supplement — J Cell Biol. 2006 Oct 9;175(1):99–110. doi: 10.1083/jcb.200511036 (PMC2064502; doi:10.1083/jcb.200511036), 2006-10-09
Supplement: jcellbiol_jcb.200511036_4.pdf [file jcellbiol_jcb.200511036_4.pdf]

Table S2. 222 genes differentially expressed between human fetal skeletal muscle SP and MP cells

| Gene Name                                                                                     | Unique Gene Symbol | Unique Entrez Gene ID | Number of Repeats | Affymetrix Probe No.                      | Average LG Fold Change SP/MP       |
|-----------------------------------------------------------------------------------------------|--------------------|-----------------------|-------------------|-------------------------------------------|------------------------------------|
| tissue factor pathway inhibitor 2                                                             | TFPI2              | 7980                  | 2                 | 209277_at // 209278_s_at                  | -1.059400// -2.072100              |
| metallothionein 1X                                                                            | MT1X               | 4501                  | 2                 | 204326_x_at // 208581_x_at                | -1.060000 // -1.768800             |
| proteasome (prosome, macropain) activator subunit 3 (PA28 $\gamma$ ; Ki)                      | PSME3              | 10197                 | 2                 | 200987_x_at // 209853_s_at                | -1.071700// -1.097500              |
| MICAL-like 1                                                                                  | MICAL-L1           | 85377                 | 2                 | 221779_at // 55081_at                     | -1.362100// -1.243000              |
| tropomyosin 1 ( $\alpha$ )                                                                    | TPM1               | 7168                  | 3                 | 206116_s_at // 210986_s_at // 210987_x_at | -1.536600// -1.171200 // -1.558200 |
| CD47 antigen (Rh-related antigen, integrin-associated signal transducer)                      | CD47               | 961                   | 2                 | 211075_s_at // 213857_s_at                | -1.577700// -1.332800              |
| metallothionein 2A                                                                            | MT2A               | 4502                  | 1                 | 212185_x_at                               | -1.6604                            |
| gremlin 1, cysteine knot superfamily, homologue ( <i>Xenopus laevis</i> )                     | GREM1              | 26585                 | 1                 | 218468_s_at                               | -1.6252                            |
| serpin peptidase inhibitor, clade E (nexin, plasminogen activator inhibitor type 1), member 1 | SERPINE1           | 5054                  | 1                 | 202628_s_at                               | -1.6250                            |
| ADP-ribosylation factor 3                                                                     | ARF3               | 377                   | 1                 | 200011_s_at                               | -1.5278                            |
| plasminogen activator, urokinase receptor                                                     | PLAUR              | 5329                  | 1                 | 210845_s_at                               | -1.5263                            |
| DIRAS family, GTP-binding RAS-like 3                                                          | DIRAS3             | 9077                  | 1                 | 215506_s_at                               | -1.4773                            |
| dihydrolipoamide S-acetyltransferase (E2 component of pyruvate dehydrogenase complex)         | DLAT               | 1737                  | 1                 | 211150_s_at                               | -1.4619                            |
| ribonucleotide reductase M2 polypeptide                                                       | RRM2               | 6241                  | 1                 | 209773_s_at                               | -1.4341                            |
| pyruvate dehydrogenase (lipoamide) $\beta$                                                    | PDHB               | 5162                  | 1                 | 208911_s_at                               | -1.4188                            |
| ZW10 interactor                                                                               | ZWINT              | 11130                 | 1                 | 204026_s_at                               | -1.4180                            |
| neuropilin 1                                                                                  | NRP1               | 8829                  | 1                 | 212298_at                                 | -1.4083                            |
| pentraxin-related gene, rapidly induced by IL-1 $\beta$                                       | PTX3               | 5806                  | 1                 | 206157_at                                 | -1.3735                            |
| tenascin C (hexabrachion)                                                                     | TNC                | 3371                  | 1                 | 201645_at                                 | -1.3626                            |
| LIM domain only 4                                                                             | LMO4               | 8543                  | 1                 | 209205_s_at                               | -1.3524                            |
| Ras suppressor protein 1                                                                      | RSU1               | 6251                  | 1                 | 201980_s_at                               | -1.3378                            |
| transforming growth factor, $\beta$ -induced, 68 kD                                           | TGFB1              | 7045                  | 1                 | 201506_at                                 | -1.3232                            |
| coenzyme Q2 homologue, prenyltransferase (yeast)                                              | COQ2               | 27235                 | 1                 | 213379_at                                 | -1.3110                            |
| tropomyosin 4                                                                                 | TPM4               | 7171                  | 1                 | 212481_s_at                               | -1.3068                            |

|                                                                                                      |          |       |   |             |         |
|------------------------------------------------------------------------------------------------------|----------|-------|---|-------------|---------|
| programmed cell death 8 (apoptosis-inducing factor)                                                  | PDCD8    | 9131  | 1 | 205512_s_at | -1.3058 |
| SH3 domain binding glutamic acid-rich protein like 3                                                 | SH3BGRL3 | 83442 | 1 | 221269_s_at | -1.2894 |
| LIM domain containing preferred translocation partner in lipoma                                      | LPP      | 4026  | 1 | 202822_at   | -1.2745 |
| replication factor C (activator 1) 4, 37 kD                                                          | RFC4     | 5984  | 1 | 204023_at   | -1.2730 |
| CD59 antigen p18-20 (antigen identified by monoclonal antibodies 16.3A5, EJ16, EJ30, EL32, and G344) | CD59     | 966   | 1 | 200984_s_at | -1.2508 |
| EGFR-coamplified and overexpressed protein                                                           | ECOP     | 81552 | 1 | 208091_s_at | -1.2328 |
| MCM4 minichromosome maintenance deficient 4 ( <i>S. cerevisiae</i> )                                 | MCM4     | 4173  | 1 | 222037_at   | -1.2204 |
| signal sequence receptor, $\alpha$ (translocon-associated protein $\alpha$ )                         | SSR1     | 6745  | 1 | 200889_s_at | -1.2203 |
| ectonucleoside triphosphate diphosphohydrolase 6 (putative function)                                 | ENTPD6   | 955   | 1 | 201704_at   | -1.2161 |
| isoprenylcysteine carboxyl methyltransferase                                                         | ICMT     | 23463 | 1 | 201609_x_at | -1.2025 |
| nuclear cap binding protein subunit 2, 20 kD                                                         | NCBP2    | 22916 | 1 | 201521_s_at | -1.1942 |
| polymerase (RNA) III (DNA directed) polypeptide K, 12.3 kD                                           | POLR3K   | 51728 | 1 | 218866_s_at | -1.1790 |
| actin, $\alpha$ 2, smooth muscle, aorta                                                              | ACTA2    | 59    | 1 | 200974_at   | -1.1764 |
| proteasome (prosome, macropain) subunit, beta type, 2                                                | PSMB2    | 5690  | 1 | 200039_s_at | -1.1746 |
| hypothetical protein FLJ20534                                                                        | FLJ20534 | 54969 | 1 | 218646_at   | -1.1715 |
| Down syndrome critical region gene 2                                                                 | DSCR2    | 8624  | 1 | 203405_at   | -1.1711 |
| protein kinase (cAMP-dependent, catalytic) inhibitor alpha                                           | PKIA     | 5569  | 1 | 204612_at   | -1.1675 |
| moesin                                                                                               | MSN      | 4478  | 1 | 200600_at   | -1.1672 |
| tetraspanin 6                                                                                        | TSPAN6   | 7105  | 1 | 209109_s_at | -1.1618 |
| alkylglycerone phosphate synthase                                                                    | AGPS     | 8540  | 1 | 205401_at   | -1.1582 |
| sorcin                                                                                               | SRI      | 6717  | 1 | 208921_s_at | -1.1524 |
| uncharacterized hypothalamus protein HT007                                                           | HT007    | 55863 | 1 | 221622_s_at | -1.1409 |
| poly (ADP-ribose) polymerase family, member 1                                                        | PARP1    | 142   | 1 | 208644_at   | -1.1334 |
| phosphatidylinositol glycan, class F                                                                 | PIGF     | 5281  | 1 | 205078_at   | -1.1300 |
| hypothetical protein FLJ10803                                                                        | FLJ10803 | 55744 | 1 | 209445_x_at | -1.1259 |

|                                                                                                      |          |       |   |             |         |
|------------------------------------------------------------------------------------------------------|----------|-------|---|-------------|---------|
| asparagine-linked glycosylation 8 homologue (yeast, $\alpha$ -1,3-glucosyltransferase)               | ALG8     | 79053 | 1 | 203545_at   | -1.1241 |
| RNA terminal phosphate cyclase domain 1                                                              | RTCD1    | 8634  | 1 | 203594_at   | -1.1237 |
| WD repeat domain 77                                                                                  | WDR77    | 79084 | 1 | 201420_s_at | -1.1075 |
| transcription factor Dp-1                                                                            | TFDP1    | 7027  | 1 | 212330_at   | -1.0858 |
| HUS1 checkpoint homologue ( <i>S. pombe</i> )                                                        | HUS1     | 3364  | 1 | 204883_s_at | -1.0710 |
| phosphoribosylaminoimidazole carboxylase, phosphoribosylaminoimidazole succinocarboxamide synthetase | PAICS    | 10606 | 1 | 201014_s_at | -1.0611 |
| malignant T cell amplified sequence 1                                                                | MCTS1    | 28985 | 1 | 218163_at   | -1.0551 |
| glutathione S-transferase $\omega$ 1                                                                 | GSTO1    | 9446  | 1 | 201470_at   | -1.0355 |
| ATP synthase, H <sup>+</sup> transporting, mitochondrial F0 complex, subunit c (subunit 9) isoform 3 | ATP5G3   | 518   | 1 | 207507_s_at | -1.0353 |
| primase, polypeptide 1, 49 kD                                                                        | PRIM1    | 5557  | 1 | 205053_at   | -1.0160 |
| maternal embryonic leucine zipper kinase                                                             | MELK     | 9833  | 1 | 204825_at   | -1.0157 |
| transducer of ERBB2, 1                                                                               | TOB1     | 10140 | 1 | 202704_at   | 1.0237  |
| cyclin-dependent kinase inhibitor 1B (p27, Kip1)                                                     | CDKN1B   | 1027  | 1 | 209112_at   | 1.0402  |
| chemokine (C-C motif) receptor 5                                                                     | CCR5     | 1234  | 1 | 204391_x_at | 1.0447  |
| rearranged L-myc fusion                                                                              | RLF      | 6018  | 1 | 204243_at   | 1.0476  |
| zinc finger protein 44 (KOX 7)                                                                       | ZNF44    | 51710 | 1 | 215359_x_at | 1.0505  |
| mSin3A-associated protein 130                                                                        | SAP130   | 79595 | 1 | 220367_s_at | 1.0571  |
| protein O-fucosyltransferase 2                                                                       | POFUT2   | 23275 | 1 | 209578_s_at | 1.0658  |
| sirtuin (silent mating type information regulation 2 homologue) 1 ( <i>S. cerevisiae</i> )           | SIRT1    | 23411 | 1 | 218878_s_at | 1.0789  |
| collagen, type IV, $\alpha$ 3 (Goodpasture antigen) binding protein                                  | COL4A3BP | 10087 | 1 | 219625_s_at | 1.0853  |
| hypothetical protein FLJ20294                                                                        | FLJ20294 | 55626 | 1 | 52731_at    | 1.0863  |
| proteasome (prosome, macropain) activator subunit 4                                                  | PSME4    | 23198 | 1 | 212222_at   | 1.0933  |
| RIO kinase 3 (yeast)                                                                                 | RIOK3    | 8780  | 1 | 202130_at   | 1.0934  |
| polo-like kinase 2 ( <i>Drosophila</i> )                                                             | PLK2     | 10769 | 1 | 201939_at   | 1.0989  |
| zinc finger protein 297B                                                                             | ZNF297B  | 23099 | 1 | 204182_s_at | 1.1052  |
| transducin-like enhancer of split 4 (E(sp1) homologue, <i>Drosophila</i> )                           | TLE4     | 7091  | 1 | 204872_at   | 1.1279  |
| cell division cycle 2-like 5 (cholinesterase-related                                                 | CDC2L5   | 8621  | 1 | 207318_s_at | 1.1465  |

|                                                                           |          |       |   |             |               |  |
|---------------------------------------------------------------------------|----------|-------|---|-------------|---------------|--|
| cell division controller)                                                 |          |       |   |             |               |  |
| myosin regulatory light chain interacting protein                         | MYLIP    | 29116 | 1 | 220319_s_at | <b>1.1655</b> |  |
| HMG-box transcription factor 1                                            | HBP1     | 26959 | 1 | 209102_s_at | <b>1.1668</b> |  |
| hypothetical protein FLJ20558                                             | FLJ20558 | 54980 | 1 | 219128_at   | <b>1.1971</b> |  |
| breast cancer anti-estrogen resistance 3                                  | BCAR3    | 8412  | 1 | 204032_at   | <b>1.2054</b> |  |
| FK506 binding protein like                                                | FKBPL    | 63943 | 1 | 219187_at   | <b>1.2086</b> |  |
| hepatitis B virus x associated protein                                    | HBXAP    | 51773 | 1 | 218166_s_at | <b>1.2318</b> |  |
| DNA-damage-inducible transcript 3                                         | DDIT3    | 1649  | 1 | 209383_at   | <b>1.2449</b> |  |
| inositol 1,4,5-trisphosphate 3-kinase C                                   | ITPKC    | 80271 | 1 | 213076_at   | <b>1.2732</b> |  |
| myelin protein zero (Charcot-Marie-Tooth neuropathy 1B)                   | MPZ      | 4359  | 1 | 210280_at   | <b>1.2859</b> |  |
| RAD52 homologue ( <i>S. cerevisiae</i> )                                  | RAD52    | 5893  | 1 | 205647_at   | <b>1.2928</b> |  |
| MYST histone acetyltransferase (monocytic leukemia) 4                     | MYST4    | 23522 | 1 | 212462_at   | <b>1.3536</b> |  |
| methyl CpG binding protein 2 (Rett syndrome)                              | MECP2    | 4204  | 1 | 202616_s_at | <b>1.3629</b> |  |
| KIAA0753 gene product                                                     | KIAA0753 | 9851  | 1 | 204711_at   | <b>1.3706</b> |  |
| pecanex homologue ( <i>Drosophila</i> )                                   | PCNX     | 22990 | 1 | 213173_at   | <b>1.3756</b> |  |
| disrupted in schizophrenia 1                                              | DISC1    | 27185 | 1 | 217330_at   | <b>1.3873</b> |  |
| cytochrome P450, family 20, subfamily A, polypeptide 1                    | CYP20A1  | 57404 | 1 | 219565_at   | <b>1.3873</b> |  |
| SH2 domain protein 1A, Duncan's disease (lymphoproliferative syndrome)    | SH2D1A   | 4068  | 1 | 205728_at   | <b>1.3979</b> |  |
| nuclear factor of activated T-cells, cytoplasmic, calcineurin-dependent 1 | NFATC1   | 4772  | 1 | 211105_s_at | <b>1.4015</b> |  |
| nucleosomal binding protein 1                                             | NSBP1    | 79366 | 1 | 221606_s_at | <b>1.4044</b> |  |
| jumonji domain containing 2B                                              | JMJD2B   | 23030 | 1 | 212492_s_at | <b>1.4217</b> |  |
| early growth response 3                                                   | EGR3     | 1960  | 1 | 206115_at   | <b>1.4264</b> |  |
| zinc fingers and homeoboxes 2                                             | ZHX2     | 22882 | 1 | 203556_at   | <b>1.4315</b> |  |
| serpin peptidase inhibitor, clade B (ovalbumin), member 1                 | SERPINB1 | 1992  | 1 | 213572_s_at | <b>1.4317</b> |  |
| RAB2, member RAS oncogene family                                          | RAB2     | 5862  | 1 | 208733_at   | <b>1.4317</b> |  |
| zinc finger protein 432                                                   | ZNF432   | 9668  | 1 | 219848_s_at | <b>1.4343</b> |  |
| solute carrier family 39 (zinc transporter), member 9                     | SLC39A9  | 55334 | 1 | 216009_at   | <b>1.4359</b> |  |
| serum/glucocorticoid regulated kinase-like                                | SGKL     | 23678 | 1 | 220038_at   | <b>1.4482</b> |  |

|                                                                                     |          |       |   |             |               |
|-------------------------------------------------------------------------------------|----------|-------|---|-------------|---------------|
| chromosome 6 open reading frame 32                                                  | C6orf32  | 9750  | 1 | 206707_x_at | <b>1.4551</b> |
| gastrin                                                                             | GAST     | 2520  | 1 | 208138_at   | <b>1.4771</b> |
| WD repeat domain 21A                                                                | WDR21A   | 26094 | 1 | 214758_at   | <b>1.4839</b> |
| cannabinoid receptor 1 (brain)                                                      | CNR1     | 1268  | 1 | 213436_at   | <b>1.4894</b> |
| nuclear factor I/B                                                                  | NFIB     | 4781  | 1 | 211467_s_at | <b>1.4968</b> |
| DiGeorge syndrome critical region gene 2                                            | DGCR2    | 9993  | 1 | 202099_s_at | <b>1.5085</b> |
| pleckstrin homology domain containing, family A member 5                            | PLEKHA5  | 54477 | 1 | 220952_s_at | <b>1.5154</b> |
| vitamin K epoxide reductase complex, subunit 1                                      | VKORC1   | 79001 | 1 | 214226_at   | <b>1.5220</b> |
| aquaporin 8                                                                         | AQP8     | 343   | 1 | 206784_at   | <b>1.5272</b> |
| Rho-guanine nucleotide exchange factor                                              | RGNEF    | 64283 | 1 | 219610_at   | <b>1.5282</b> |
| E74-like factor 2 (ets domain transcription factor)                                 | ELF2     | 1998  | 1 | 210361_s_at | <b>1.5425</b> |
| KIAA0999 protein                                                                    | KIAA0999 | 23387 | 1 | 204156_at   | <b>1.5472</b> |
| potassium voltage-gated channel, shaker-related subfamily, $\beta$ member 1         | KCNAB1   | 7881  | 1 | 210078_s_at | <b>1.5581</b> |
| chromosome 13 open reading frame 22                                                 | C13orf22 | 10208 | 1 | 204190_at   | <b>1.5639</b> |
| nuclear transcription factor, X-box binding 1                                       | NFX1     | 4799  | 1 | 210268_at   | <b>1.5756</b> |
| Rho GTPase activating protein 15                                                    | ARHGAP15 | 55843 | 1 | 218870_at   | <b>1.5803</b> |
| hairy/enhancer-of-split related with YRPW motif 2                                   | HEY2     | 23493 | 1 | 219743_at   | <b>1.5818</b> |
| hypothetical protein FLJ20054                                                       | FLJ20054 | 54530 | 1 | 219696_at   | <b>1.5826</b> |
| basic leucine zipper nuclear factor 1 (JEM-1)                                       | BLZF1    | 8548  | 1 | 203840_at   | <b>1.5845</b> |
| ankyrin repeat domain 12                                                            | ANKRD12  | 23253 | 1 | 212286_at   | <b>1.5870</b> |
| ubiquitin specific peptidase 52                                                     | USP52    | 9924  | 1 | 203117_s_at | <b>1.5980</b> |
| zinc finger protein 667                                                             | ZNF667   | 63934 | 1 | 207120_at   | <b>1.5998</b> |
| protein-O-mannosyltransferase 1                                                     | POMT1    | 10585 | 1 | 218476_at   | <b>1.6110</b> |
| hypothetical protein FLJ20152                                                       | FLJ20152 | 54463 | 1 | 218532_s_at | <b>1.6118</b> |
| T-box 19                                                                            | TBX19    | 9095  | 1 | 206838_at   | <b>1.6188</b> |
| GIPC PDZ domain containing family, member 2                                         | GIPC2    | 54810 | 1 | 219970_at   | <b>1.6195</b> |
| leukocyte cell derived chemotaxin 1                                                 | LECT1    | 11061 | 1 | 206309_at   | <b>1.6245</b> |
| serine/threonine kinase 17b (apoptosis-inducing)                                    | STK17B   | 9262  | 1 | 217503_at   | <b>1.6270</b> |
| phosphorylase, glycogen; muscle (McArdle syndrome, glycogen storage disease type V) | PYGM     | 5837  | 1 | 205577_at   | <b>1.6308</b> |
| hypothetical protein FLJ10374                                                       | FLJ10374 | 55702 | 1 | 204335_at   | <b>1.6334</b> |

|                                                                                            |          |        |   |             |               |
|--------------------------------------------------------------------------------------------|----------|--------|---|-------------|---------------|
| sirtuin (silent mating type information regulation 2 homologue) 4 ( <i>S. cerevisiae</i> ) | SIRT4    | 23409  | 1 | 220047_at   | <b>1.6503</b> |
| Nipped-B homologue ( <i>Drosophila</i> )                                                   | NIPBL    | 25836  | 1 | 212483_at   | <b>1.6524</b> |
| phospholipase C-like 1                                                                     | PLCL1    | 5334   | 1 | 205934_at   | <b>1.6579</b> |
| hypothetical protein FLJ36754                                                              | FLJ36754 | 285672 | 1 | 217608_at   | <b>1.6622</b> |
| WW domain containing adaptor with coiled-coil                                              | WAC      | 51322  | 1 | 219679_s_at | <b>1.6629</b> |
| aldehyde dehydrogenase 6 family, member A1                                                 | ALDH6A1  | 4329   | 1 | 204290_s_at | <b>1.6679</b> |
| synaptotagmin XVII                                                                         | SYT17    | 51760  | 1 | 205613_at   | <b>1.6774</b> |
| WD repeat domain 33                                                                        | WDR33    | 55339  | 1 | 218851_s_at | <b>1.6880</b> |
| mitochondrial tumor suppressor 1                                                           | MTUS1    | 57509  | 1 | 212096_s_at | <b>1.7067</b> |
| zinc finger protein 304                                                                    | ZNF304   | 57343  | 1 | 207753_at   | <b>1.7087</b> |
| oxidation resistance 1                                                                     | OXR1     | 55074  | 1 | 218197_s_at | <b>1.7107</b> |
| sodium channel, voltage-gated, type III, $\beta$                                           | SCN3B    | 55800  | 1 | 204723_at   | <b>1.7114</b> |
| DnaJ (Hsp40) homologue, subfamily B, member 4                                              | DNAJB4   | 11080  | 1 | 203810_at   | <b>1.7153</b> |
| hypothetical protein FLJ11011                                                              | FLJ11011 | 55284  | 1 | 218521_s_at | <b>1.7183</b> |
| sclerostin domain containing 1                                                             | SOSTDC1  | 25928  | 1 | 213456_at   | <b>1.7267</b> |
| sine oculis homeobox homologue 1 ( <i>Drosophila</i> )                                     | SIX1     | 6495   | 1 | 205817_at   | <b>1.7408</b> |
| RAS-like, family 12                                                                        | RASL12   | 51285  | 1 | 219167_at   | <b>1.7476</b> |
| zinc finger protein 230                                                                    | ZNF230   | 7773   | 1 | 205791_x_at | <b>1.7572</b> |
| Jumonji, AT rich interactive domain 1A (RBBP2-like)                                        | JARID1A  | 5927   | 1 | 215698_at   | <b>1.7699</b> |
| zinc finger protein 237                                                                    | ZNF237   | 9205   | 1 | 215948_x_at | <b>1.7747</b> |
| hypothetical protein FLJ43806                                                              | FLJ43806 | 399563 | 1 | 213752_at   | <b>1.7791</b> |
| sel-1 suppressor of lin-12-like ( <i>C. elegans</i> )                                      | SEL1L    | 6400   | 1 | 202063_s_at | <b>1.7804</b> |
| methyl-CpG binding domain protein 2                                                        | MBD2     | 8932   | 1 | 214397_at   | <b>1.7846</b> |
| leucine rich repeat containing 2                                                           | LRRC2    | 79442  | 1 | 219949_at   | <b>1.7851</b> |
| retinoic acid induced 2                                                                    | RAI2     | 10742  | 1 | 219440_at   | <b>1.7927</b> |
| zinc finger protein 222                                                                    | ZNF222   | 7673   | 1 | 206175_x_at | <b>1.7988</b> |
| bromodomain and WD repeat domain containing 1                                              | BRWD1    | 54014  | 1 | 214820_at   | <b>1.8078</b> |
| zinc finger protein 654                                                                    | ZNF654   | 55279  | 1 | 219239_s_at | <b>1.8106</b> |
| leucine rich repeat neuronal 3                                                             | LRRN3    | 54674  | 1 | 209840_s_at | <b>1.8122</b> |
| F-box protein 42                                                                           | FBXO42   | 54455  | 1 | 221812_at   | <b>1.8165</b> |

|                                                                                                                                        |              |        |   |             |               |
|----------------------------------------------------------------------------------------------------------------------------------------|--------------|--------|---|-------------|---------------|
| phosphodiesterase 1A, calmodulin-dependent                                                                                             | PDE1A        | 5136   | 1 | 208396_s_at | <b>1.8200</b> |
| ATP-binding cassette, sub-family F (GCN20), member 2                                                                                   | ABCF2        | 10061  | 1 | 207623_at   | <b>1.8299</b> |
| AHNAK nucleoprotein (desmoyokin)                                                                                                       | AHNAK        | 79026  | 1 | 220016_at   | <b>1.8330</b> |
| H2A histone family, member J                                                                                                           | H2AFJ        | 55766  | 1 | 220936_s_at | <b>1.8391</b> |
| RAB33A, member RAS oncogene family                                                                                                     | RAB33A       | 9363   | 1 | 206039_at   | <b>1.8481</b> |
| protein phosphatase 1D magnesium-dependent, delta isoform                                                                              | PPM1D        | 8493   | 1 | 204566_at   | <b>1.8498</b> |
| PDZ domain containing 1                                                                                                                | PDZK1        | 5174   | 1 | 205380_at   | <b>1.8542</b> |
| lectin, galactoside-binding, soluble, 4 (galectin 4)                                                                                   | LGALS4       | 3960   | 1 | 204272_at   | <b>1.8579</b> |
| allantoicase                                                                                                                           | ALLC         | 55821  | 1 | 220365_at   | <b>1.8629</b> |
| phospholipase A2, group IVC (cytosolic, calcium-independent)                                                                           | PLA2G4C      | 8605   | 1 | 209785_s_at | <b>1.8834</b> |
| olfactory receptor, family 7, subfamily E, member 47 pseudogene                                                                        | OR7E47P      | 26628  | 1 | 222304_x_at | <b>1.8844</b> |
| PI-3-kinase-related kinase SMG-1-like                                                                                                  | DKFZp547E087 | 283846 | 1 | 221992_at   | <b>1.8845</b> |
| sushi, nidogen, and EGF-like domains 1                                                                                                 | SNED1        | 25992  | 1 | 213488_at   | <b>1.8903</b> |
| myeloid/lymphoid or mixed-lineage leukemia (trithorax homologue, <i>Drosophila</i> )                                                   | MLL          | 4297   | 1 | 212079_s_at | <b>1.8920</b> |
| zinc finger protein 451                                                                                                                | ZNF451       | 26036  | 1 | 215012_at   | <b>1.8987</b> |
| chromosome 1 open reading frame 66                                                                                                     | C1orf66      | 51093  | 1 | 218914_at   | <b>1.9393</b> |
| advillin                                                                                                                               | AVIL         | 10677  | 1 | 205539_at   | <b>1.9405</b> |
| lactate dehydrogenase A-like 6B                                                                                                        | LDHAL6B      | 92483  | 1 | 210712_at   | <b>1.9587</b> |
| unc-84 homologue A ( <i>C. elegans</i> )                                                                                               | UNC84A       | 23353  | 1 | 206487_at   | <b>1.9632</b> |
| hypothetical protein FLJ23861                                                                                                          | FLJ23861     | 151050 | 1 | 215046_at   | <b>1.9661</b> |
| nuclear receptor subfamily 3, group C, member 2                                                                                        | NR3C2        | 4306   | 1 | 205259_at   | <b>2.0069</b> |
| integrin, $\alpha$ M (complement component receptor 3, $\alpha$ ; also known as CD11b (p170), macrophage antigen $\alpha$ polypeptide) | ITGAM        | 3684   | 1 | 205786_s_at | <b>2.0088</b> |
| epilepsy, progressive myoclonus type 2A, Lafora disease (laforin)                                                                      | EPM2A        | 7957   | 1 | 205231_s_at | <b>2.0247</b> |
| ret finger protein-like 3 antisense                                                                                                    | RFPL3S       | 10737  | 1 | 214409_at   | <b>2.0276</b> |
| CBF1 interacting corepressor                                                                                                           | CIR          | 9541   | 1 | 209571_at   | <b>2.0375</b> |
| proprotein convertase subtilisin/kexin type 5                                                                                          | PCSK5        | 5125   | 1 | 213652_at   | <b>2.0399</b> |
| AT rich interactive domain 4A (RBP1-like)                                                                                              | ARID4A       | 5926   | 1 | 205062_x_at | <b>2.0403</b> |

|                                                                  |           |       |   |                            |                           |
|------------------------------------------------------------------|-----------|-------|---|----------------------------|---------------------------|
| PH domain and leucine rich repeat protein phosphatase            | PHLPP     | 23239 | 1 | 212719_at                  | <b>2.0468</b>             |
| TATA element modulatory factor 1                                 | TMF1      | 7110  | 1 | 213024_at                  | <b>2.0533</b>             |
| RAB33B, member RAS oncogene family                               | RAB33B    | 83452 | 1 | 221014_s_at                | <b>2.0538</b>             |
| calmodulin binding transcription activator 1                     | CAMTA1    | 23261 | 1 | 213268_at                  | <b>2.0580</b>             |
| growth arrest-specific 2                                         | GAS2      | 2620  | 1 | 205848_at                  | <b>2.0682</b>             |
| CG016                                                            | LOC88523  | 88523 | 1 | 214748_at                  | <b>2.0858</b>             |
| pellino homologue 2 ( <i>Drosophila</i> )                        | PELI2     | 57161 | 1 | 219132_at                  | <b>2.0975</b>             |
| period homologue 1 ( <i>Drosophila</i> )                         | PER1      | 5187  | 1 | 202861_at                  | <b>2.1192</b>             |
| cyclin A1                                                        | CCNA1     | 8900  | 1 | 205899_at                  | <b>2.1324</b>             |
| histone 1, H2ae                                                  | HIST1H2AE | 3012  | 1 | 214469_at                  | <b>2.1325</b>             |
| zinc finger protein 20 (KOX 13)                                  | ZNF20     | 7568  | 1 | 213916_at                  | <b>2.1660</b>             |
| heat shock 70-kD protein 1-like                                  | HSPA1L    | 3305  | 1 | 210189_at                  | <b>2.1710</b>             |
| chorionic somatomammotropin hormone 1 (placental lactogen)       | CSH1      | 1442  | 1 | 208068_x_at                | <b>2.1740</b>             |
| TBC1 domain family, member 3                                     | TBC1D3    | 84218 | 1 | 209403_at                  | <b>2.1753</b>             |
| bone morphogenetic protein 4                                     | BMP4      | 652   | 1 | 211518_s_at                | <b>2.1905</b>             |
| REST corepressor 3                                               | RCOR3     | 55758 | 1 | 218344_s_at                | <b>2.2058</b>             |
| insulin-like growth factor binding protein 2, 36 kD              | IGFBP2    | 3485  | 1 | 202718_at                  | <b>2.2278</b>             |
| nuclear receptor subfamily 4, group A, member 2                  | NR4A2     | 4929  | 1 | 204621_s_at                | <b>2.2320</b>             |
| SH3 domain binding glutamic acid-rich protein                    | SH3BGR    | 6450  | 1 | 204979_s_at                | <b>2.2819</b>             |
| endothelin 3                                                     | EDN3      | 1908  | 1 | 208399_s_at                | <b>2.3051</b>             |
| peroxisome biogenesis factor 1                                   | PEX1      | 5189  | 1 | 204873_at                  | <b>2.3776</b>             |
| zinc finger protein 211                                          | ZNF211    | 10520 | 1 | 205437_at                  | <b>2.3978</b>             |
| osmosis responsive factor                                        | OSRF      | 23548 | 1 | 219421_at                  | <b>2.4201</b>             |
| v-maf musculoaponeurotic fibrosarcoma oncogene homologue (avian) | MAF       | 4094  | 1 | 206363_at                  | <b>2.4258</b>             |
| ubiquitously transcribed tetratricopeptide repeat, X chromosome  | UTX       | 7403  | 1 | 203991_s_at                | <b>2.6274</b>             |
| zinc finger and BTB domain containing 10                         | ZBTB10    | 65986 | 1 | 219312_s_at                | <b>2.6578</b>             |
| calcitonin receptor                                              | CALCR     | 799   | 1 | 207886_s_at                | <b>2.6878</b>             |
| splicing factor 3b, subunit 1, 155kD                             | SF3B1     | 23451 | 2 | 201070_x_at // 214305_s_at | <b>1.131100//1.026000</b> |
| RB1-inducible coiled-coil 1                                      | RB1CC1    | 9821  | 2 | 202033_s_at // 202034_x_at | <b>1.189800//1.403100</b> |



|                                                                                                                |               |       |   |                                              |                                     |
|----------------------------------------------------------------------------------------------------------------|---------------|-------|---|----------------------------------------------|-------------------------------------|
| huntingtin interacting protein B                                                                               | HYPB          | 29072 | 2 | 215038_s_at // 212493_s_at                   | <b>1.269100//1.721000</b>           |
| retinoblastoma binding protein 6                                                                               | RBBP6         | 5930  | 2 | 212781_at // 212783_at                       | <b>1.453700//1.200400</b>           |
| hypothetical protein DKFZp564O0523                                                                             | DKFZP564O0523 | 84060 | 2 | 221595_at // 221596_s_at                     | <b>1.822000//1.703700</b>           |
| cylindromatosis (turban tumor syndrome)                                                                        | CYLD          | 1540  | 3 | 213295_at // 221905_at //<br>39582_at        | <b>1.823400//1.925700//2.276300</b> |
| myeloid/lymphoid or mixed-lineage leukemia<br>(trithorax homologue, <i>Drosophila</i> ); translocated<br>to, 3 | MLLT3         | 4300  | 2 | 204917_s_at // 204918_s_at                   | <b>1.856100//1.786200</b>           |
| SUMO1/sentrin specific peptidase 6                                                                             | SENP6         | 26054 | 2 | 214790_at // 202319_at                       | <b>1.942100//1.615800</b>           |
| trinucleotide repeat containing 9                                                                              | TNRC9         | 27324 | 3 | 214774_x_at // 215108_x_at<br>// 216623_x_at | <b>2.505400//2.112100//2.159500</b> |
